# Supplementary material
Source: PubMed Central journal article supplement (PMC2435144)
Supplement: pbio.0060143.sg003.pdf [file pbio.0060143.sg003.pdf]

$\alpha A$   $\beta A$   
*CapAB* . . . . .  
*CapAB* 1 . . . . . V I F D K R I K D E D V . E K E L G L P V L G S I Q . . . . . K F N . . . . .  
*YwqCD* 1 . . . . . L D N T I K S E E Q L . E S L L D I P V L G T V S . . . . . T I A N E Q K T A K T L A G F Q S E K T G S G H F G A . . . . . M  
*YveKL* 1 . . . . . H F L D D T C K S A R Q L . S E R T G L P C L G S V P . . . . . D V H K G R N R G I K H F G E . . . . . M  
*Wzc* 1 S L F N R G I E S P Q V L E E H G I S V Y A T I P M S E W L D K R . . . . . S V K T I K G I K R Y . . . . .  
*Etk* 1 A M L R R G V E A P E Q L E E H G I S V Y A T I P M S E W L D K R . . . . . T R L R K K N . . . . . L  
*Ptk* 1 M M R S G I K D S T Q I E N E L D L P V Y A T V P R S P V Q E S R I . N I L K K K K . . . . .  
*BYKEa* 1 A L F H H G I D N P E Q L E E L G L N V Y A S V P L S E W Q R K K D Q E T L L K R K . . . . .  
*BYKRs* 1 A L F G G I T D P Q D I E E H T G L S V Y A T V P L S D T Q V D L S G . Q L T T R K . . . . .  
*BYKSa* 1 T S N V R V L D P A R P Q E M P I K P N V E R S V M A M A L G L . L V G V G V V V L L E F L E S S I S S Q V D V E Q K L G L A F L G F V P

$\alpha 1$   $\alpha 2$   $\beta 1$   $\alpha 3$   
*CapAB* . . . . .  
*CapAB* 30 . . . M T N T R R S T S S L I V H E Q P K S P I S E K F R G I R S N M F A N P D S A V Q S I V I T S E A P G A G K S T I A A N L A V A Y A  
*YwqCD* 53 A L R K N R G S R M Q R N V I A M T E P K S L N S E Q Y R T I R T N I E F A S V D R Q M K S V M I T S A C P G E G K S T T A A N L A V V F A  
*YveKL* 43 I F R K K K A R R G L A Q I S V L H N . K S V V A E Q Y R T I R T N I E F S S V Q T N L R S I L V T S S V P G E G K S F S A A N L A A V F A  
*Wzc* 46 . . . . . K Q S Q L L A V G N P T D L A I E A I R S L R T S L H F A M M Q A Q N N V L M M T G V S P S I G K T F V S T L A A V I A  
*Etk* 42 F S N Q Q R H R T K N I P F L A V D N P A D S A V E A V R A L R T S L H F A M M E T E N N I L M I T G A T P D S G K T F V S T L A A V I A  
*Ptk* 42 . . . . . N I P L A V K N S D D I A I E S E R S M R T A L H F A L S S A R N N L I T I S G P A P E V G K S F I S T N L A T I L A  
*BYKEa* 43 . . . L D A R T D P H N R L L A L G N P T D L S I E A I R S L R T S L H F A M M D A Q N N I L M I T G A S P G I G K T F V C A N L A T L V A  
*BYKRs* 42 . . . . . R G Q Y L L A R R V P D D P S I E A L R S L R T A L Q E A M Q D A G N N I L V L T G P T P G V G K S F V S A N L A A V I A  
*BYKSa* 70 R V E G K G E N P G E R D L Y V H R Q P K S S V A E C C R A I R T N L L E M S P D K P F K T L V V T S S G Q Q E G K S T S C I F L G V A M A

$\beta 2$   $\alpha 4$   $\alpha 5$   $\alpha 6$   $\beta 3$   $\beta 4$   $\alpha 7$   
*CapAB* . . . . .  
*CapAB* 97 Q A G . Y K T L I V D G D M R K P T Q H Y I F N D P N N E G L S L L I N W S T Y Q D S I I S T E I Q D L D V I T S G P I P P N P S E L L I T  
*YwqCD* 123 Q Q G . K K V L L I D A D L R K P T V H T A F F L E N T V G L T S V L L K K S S M E Q A V Q A S N E K H L D V L T S G P I P P N P A E L L S  
*YveKL* 112 Q Q E K K V L L V D A D L R K P T I N Q T F Q V D N V T G L T N V L V G N A S L S E T V Q K T P I D N L Y V L T S G P T P P N P A E L L S  
*Wzc* 107 Q T N . K R V L L I D C D M R K G Y T H E L L G T N N V N G L S E I L I G Q G D I T T A A K P T S I A K F D L I P R G Q V P P N P S E L L M  
*Etk* 112 Q S D . K V V L F I D A D L R R G Y S H N L F T V S N E H G L S E Y L A G K D E L N V I Q H F G K G G F D V I T R G Q V P P N P S E L L M  
*Ptk* 102 Q S D . K R V L I I D A D L R R G Y L H K Y F N L D T Q P L T E L L N G Q S L E T V I R H T E V P G L S V I S R K S F A N P S E L L S  
*BYKEa* 110 K T G . E K V L F I D G D M R R G Y T H E L L G A E S K T G L S D I L S G K L P F N T D L V Q R G D Y G F D F I A R Q V P P N P S E L L M  
*BYKRs* 103 T G S . K R V L L I D A D M R K G Y L H Q Y F G K D R K P G L L D L L A G N R S I E Q V V H R E V V P G L D F I A T G L F P H N P S E L L L  
*BYKSa* 140 Q S G . N R V L L M D T D M R R P R L H K A F G V P N D V G I S L V V G E G S L D R A V K S T E V P N L F V L P C G P I P P N P A E L L H

$\alpha 8$   $\beta 5$   $\alpha 9$   $\beta 6$   $\alpha 10$   
*CapAB* . . . . .  
*CapAB* 166 S R A F A N I Y D T L L M N Y N F V I I D T P P V N T V T D A Q L F S R F T G N V V Y V V N S E N N R D E V K K G K E L I E A T G A K L L  
*YwqCD* 192 S K W M K T A Y E A C A A Y D M V I F D T P P I L A V A D A Q I L G N V A D G S V L V I S S G K T E K E Q A A K A K E A L A T C S K L L  
*YveKL* 182 S K A M G D I S E I Y E Q F S L V I F D S P P L L A V A D A Q I L A N Q T D G S V L V L S G K T K T D T V L K A K D A L E Q S N A K L L  
*Wzc* 176 S E R F A B I V N W A S K N Y D L V L I D T P P I L A V T D A A I V G R H V G T T L M V A R Y A V N T L K E V E T S L S R F E Q N G I P V K  
*Etk* 181 R D R M R Q L E W A N D H Y D L V I V D T P P M L A V S D A A V G R S V G T S L L V A R F G L N T A K E V S L S M Q R L E Q A G V N I K  
*Ptk* 171 S N Q F K N L E Q M S E K F D H V I I D T P P V L A V T D G I I I S Q Y T G V N L V I A R Y A K T Q M K E L E L T L N R F E Q A G V K V N  
*BYKEa* 179 N S R M K L V H W A S Q N Y D L V L I D T P P I L A V T D A S I I G K L A G T S L M V A R F E T N T V K E V E I S Y K R F I Q N G I D I K  
*BYKRs* 172 N P R M V E I M D T F R S Q Y D L V L V D T P P V L A V A D T A I L A A R A G L V L L V T R F E R S T L G E I R E T I K Q L O H A N V D V R  
*BYKSa* 209 T Q A F A D L K T V S G K F D R I L L D S P P L N A V S D S A V L A T Q V D G V V L V L R A G K T H Q D A A R A L R S L A D V Q A Q I Y

$\beta 7$   
*CapAB* . . . . .  
*CapAB* 236 G V V L N R M P K D K S . . . . . A S Y Y A Y Y G T D E S . . . . .  
*YwqCD* 262 G A I M N G K K L S K . . . . . H S E Y G Y Y G T K D N F M Q K . . . . .  
*YveKL* 252 G A L L N K K K . . . . . M K K S E H Y S Y . . . . .  
*Wzc* 246 G V I L N S I F R R . . . . . A S A Y Q D Y G Y Y E Y E Y K S D A K . . . . .  
*Etk* 251 G A I L N G V I K . . . . . R A S T A Y S Y G Y N Y Y G Y S Y S E K E . . . . .  
*Ptk* 241 G F I L N D I Q R S S . . . . . A G Y G Y G Y G Y N Y A Y A Y K A N K E S D . . . . .  
*BYKEa* 249 G I I L N A V V R K . . . . . S A N N Y G Y C Y D Y Y D Y S Y Q Q G E K S . . . . .  
*BYKRs* 242 G V V F N A L D P N T Y . . . . . R Y G Y G S R Y G R Y R Y V Q Y G Y T S N S K P P E A E S A . . . . .  
*BYKSa* 279 G A I L N D L E S T D G R Y K E S Y L Y P G D Y G Q R E E V K D R V A S S . . . . .
